# Supplementary material for: Plasmon-enhanced efficient dye-sensitized solar cells using core–shell-structured β-NaYF4:Yb,Er@SiO2@Au nanocomposites
Source: Royal Society of Chemistry journal article supplement (doi:10.1039/c4ta02230k), 2014-01-01
Supplement: c4ta02230k1.pdf [file c4ta02230k1.pdf]

**Electronic Supplementary Information For**

**Plasmon enhanced efficient dye-sensitized solar cells using core-shell-  
structured  $\beta$ -NaYF<sub>4</sub>:Yb,Er@SiO<sub>2</sub>@Au nanocomposites**

Peng Zhao, Yihua Zhu,\* Xiaoling Yang, Xin Jiang, Jianhua Shen, and Chunzhong  
Li\*

Key Laboratory for Ultrafine Materials of Ministry of Education, School of Materials  
Science and Engineering, East China University of Science and Technology, 130  
Meilong Road, Shanghai 200237, China

\*Corresponding author: Tel.: +86-21-64252022, Fax: +86-21-64250624

E-mail address: yhzhu@ecust.edu.cn (Y. Zhu), czli@ecust.edu.cn (C. Li)

## Experimental

### *Measurement of upconversion quantum yield*

The quantum yield of upconversion luminescence emission of the UCNPs was calculated with the following equation:<sup>1</sup>

$$QY = \frac{\textit{Photos emitted}}{\textit{Photos absorbed}} = \frac{L_{\textit{sample}}}{E_{\textit{reference}} - E_{\textit{sample}}}$$

Where QY is the quantum yield,  $L_{\text{sample}}$  is the emission intensity;  $E_{\text{reference}}$  and  $E_{\text{sample}}$  are the intensities of the excitation light in the presence of the undoped and doped upconversion samples, respectively. Quantum yield measurement was performed using a fluorescence spectroscopy (Edinburgh LFS920) modified by using Ocean Optics UV-VIS-NIR CCD (QE65000) as a detector for collecting the 980 nm light and the UC emissions. An integrating sphere was also used to measure the efficiency data. The response of the detection systems in photon flux was determined using a calibrated VIS-NIR lamp (Ocean Optics LS-1-CAL). In addition, pure NaYF<sub>4</sub> without doped Yb<sup>3+</sup> and Er<sup>3+</sup> ions were used as reference for measurement of 980 nm absorption.

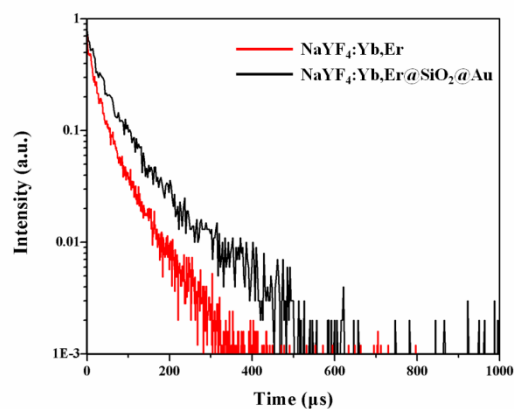

Figure S1 Decay curves of  $\text{Er}^{3+}$  emission at 543 nm by excitation at 980 nm in  $\text{NaYF}_4:\text{Yb,Er}$  and  $\text{NaYF}_4:\text{Yb,Er}@SiO_2@Au$  samples.

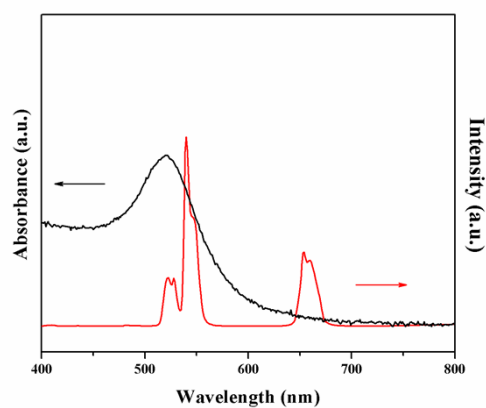

Figure S2 UV-vis absorption spectrum of Au NPs (black curve) and upconversion fluorescence spectrum of  $\text{NaYF}_4:\text{Yb,Er}$  NPs (red curve).

## Reference

- 1 J. C. Boyer, F. C. J. M. van Veggel, *Nanoscale*, 2010, **2**, 1417.
